# Supplementary material
Source: PubMed Central journal article supplement (PMC4816667)
Supplement: NIHMS745961-supplement-supplement_1.pdf [file NIHMS745961-supplement-supplement_1.pdf]

## Supplementary Data

Supplementary Table 1. Participant demographics for those with PD. DBS = deep brain stimulation.

| <b>Age / Sex</b> | <b>Years Since Diagnosis</b> | <b>Hoehn &amp; Yahr Score</b> | <b>Medications / DBS</b>       |
|------------------|------------------------------|-------------------------------|--------------------------------|
| 66 / M           | 3                            | 1.5                           | DBS on                         |
| 66 / M           | 9                            | 1                             | Carbidopa/levodopa, Rasagiline |
| 73 / F           | 15                           | 1                             | Carbidopa/levodopa, Selegiline |
| 74 / M           | 3                            | 1.5                           | Carbidopa/levodopa             |
| 70 / F           | 2                            | 2                             | Pramipexole, Rasagiline        |
| 60 / F           | 4                            | 1                             | Carbidopa/levodopa             |
| 58 / F           | 8                            | 2                             | Carbidopa/levodopa             |
| 88 / M           | 4                            | 3                             | Carbidopa/levodopa, Amantadine |
| 51 / F           | 7                            | 3                             | Carbidopa/levodopa, Ropinirole |
| 67 / M           | 3                            | 3                             | Carbidopa/levodopa             |
| 69 / F           | 15                           | 3                             | Carbidopa/levodopa             |
| 50 / M           | 12                           | 2                             | Carbidopa/levodopa             |
| 82 / M           | 2                            | 1                             | Carbidopa/levodopa             |
| 85 / M           | 6                            | 3                             | Carbidopa/levodopa             |
| 81 / M           | 3                            | 3                             | Carbidopa/levodopa             |
| 65 / M           | 15                           | 3                             | Carbidopa/levodopa, Amantadine |
| 74 / M           | 1.5                          | 2                             | Carbidopa/levodopa             |
| 69 / M           | 4                            | 3                             | Carbidopa/levodopa             |
| 70 / F           | 16                           | 3                             | Carbidopa/levodopa, Ropinirole |
| 75 / F           | 3                            | 2                             | Carbidopa/levodopa             |
| 62 / F           | 13                           | 1                             | Carbidopa/levodopa, Ropinirole |
| 80 / F           | 3                            | 2                             | Carbidopa/levodopa             |
| 55 / F           | 18                           | 2                             | Carbidopa/levodopa, Rasagiline |
| 72 / F           | 8                            | 1                             | Carbidopa/levodopa             |
| 82 / M           | 8                            | 2                             | Carbidopa/levodopa             |
| 62 / F           | 6                            | 1                             | Carbidopa/levodopa, Amantadine |
